# Supplementary material for: New transfer of care initiative of electronic referral from hospital to community pharmacy in England: a formative service evaluation
Source: PubMed Central journal article supplement — BMJ Open. 2016 Oct 14;6(10):e012532. doi: 10.1136/bmjopen-2016-012532 (PMC5073802; doi:10.1136/bmjopen-2016-012532), 2016-10-14
Supplement: bmjopen-2016-012532supp_file2.pdf [file bmjopen-2016-012532supp_file2.pdf]

## SUPPLEMENTAL FILE 2.

### Transfer of Care – Developments made via the AHSN Project Team since July 2015

#### Members:

Project Lead (SB)  
Project Manager  
Chair of Durham, Darlington and Tees Local Pharmacy Network  
Representative of North of Tyne Local Pharmacy Committee (AG)  
Senior Clinical Pharmacist, Northumberland Tyne and Wear  
Clinical Services Manager, North Tees & Hartlepool  
Representative of Tees Local Pharmacy Committee  
Practice Pharmacist, North East Commissioning Support  
Representative of HealthWatch England  
Representative of University of Durham (SPS)  
Clinical Pharmacist, County Durham and Darlington NHS Foundation Trust  
Representative of NHS England

| Date                 | Change made                                                                                                                                                                                                                         | Desired outcome                                                                                                                 |
|----------------------|-------------------------------------------------------------------------------------------------------------------------------------------------------------------------------------------------------------------------------------|---------------------------------------------------------------------------------------------------------------------------------|
| <b>October 2014</b>  | Simplified the hospital referral template so only Royal Pharmaceutical Society recommended core contents for Transfer of Care records were recorded.                                                                                | Reduce time spent making hospital referrals and to allow staff to focus on the quality of referral being made.                  |
| <b>December 2014</b> | A mandatory 'Pharmacy Actions' field was added to the community pharmacy template.                                                                                                                                                  | Provide some detail about the interventions being made by the community pharmacists and therefore help motivate pharmacy staff. |
| <b>December 2014</b> | A mandatory RiO scoring field was added to the community pharmacy template.                                                                                                                                                         | Make community pharmacists consider the likelihood their intervention had on preventing a hospital readmission.                 |
| <b>December 2014</b> | Community pharmacy template was amended so the community pharmacist had to select from a drop down menu why a referral had been rejected.                                                                                           | Help better understand why hospital referrals were being rejected.                                                              |
| <b>January 2015</b>  | After confirming that all hospital referrals would automatically qualify for approval for a telephone or domiciliary MUR service, the required application forms and guidance notes were linked to the community pharmacy template. | Reduce rejected referrals and improve patient outcomes.                                                                         |
| <b>January 2015</b>  | Feedback provided to hospital pharmacy staff on the outcome of their referrals (as a consequence of changes made to the community pharmacy template in December 2015).                                                              | Motivate hospital staff to make referrals.                                                                                      |
| <b>February 2015</b> | Original FAQ document for community pharmacists (which is attached to the community                                                                                                                                                 | Reduce rejected referrals and improve patient outcomes                                                                          |

|                    |                                                                                                                                                                                                                                                                                                                                                   |                                                                                                                                                                    |
|--------------------|---------------------------------------------------------------------------------------------------------------------------------------------------------------------------------------------------------------------------------------------------------------------------------------------------------------------------------------------------|--------------------------------------------------------------------------------------------------------------------------------------------------------------------|
|                    | pharmacy template) was updated and circulated to pharmacies highlighting changes to the service and the community pharmacy template                                                                                                                                                                                                               |                                                                                                                                                                    |
| <b>June 2015</b>   | <p>The list of options why hospital referrals were being rejected was changed as the default had been set as 'housebound', the default is now blank and cannot be selected.</p> <p>If the reason for rejection was selected as 'housebound' additional information was provided about how to claim payment for telephone and domiciliary MURs</p> | <p>Correct the erroneous recording of 'housebound' as the reason for rejecting a referral.</p> <p>Increase the number of housebound patients receiving support</p> |
| <b>August 2015</b> | Documents (e.g. discharge summaries) able to be attached to hospital referrals.                                                                                                                                                                                                                                                                   | Allow community pharmacy medicines reconciliations, reduce medication errors and improve patient outcomes.                                                         |
