# Supplementary material for: New transfer of care initiative of electronic referral from hospital to community pharmacy in England: a formative service evaluation
Source: PubMed Central journal article supplement — BMJ Open. 2016 Oct 14;6(10):e012532. doi: 10.1136/bmjopen-2016-012532 (PMC5073802; doi:10.1136/bmjopen-2016-012532), 2016-10-14
Supplement: bmjopen-2016-012532supp_file3.pdf [file bmjopen-2016-012532supp_file3.pdf]

**SUPPLEMENTAL FILE 3.** The number of days post-discharge for referrals to be actioned.

| <b>Number of days<br/>post-discharge to<br/>action</b> | <b>Outcome of referrals (number (%))</b> |                          |                         |
|--------------------------------------------------------|------------------------------------------|--------------------------|-------------------------|
|                                                        | <b>Accepted (n=166)</b>                  | <b>Completed (n=619)</b> | <b>Rejected (n=955)</b> |
| <b>&lt; 7</b>                                          | 93 (56.1)                                | 410 (66.2)               | 316 (33.1)              |
| <b>7-14</b>                                            | 33 (19.8)                                | 110 (17.8)               | 232 (24.3)              |
| <b>&gt;14</b>                                          | 40 (24.1)                                | 100 (16.1)               | 407 (42.6)              |
