# Supplementary material for: New transfer of care initiative of electronic referral from hospital to community pharmacy in England: a formative service evaluation
Source: PubMed Central journal article supplement — BMJ Open. 2016 Oct 14;6(10):e012532. doi: 10.1136/bmjopen-2016-012532 (PMC5073802; doi:10.1136/bmjopen-2016-012532), 2016-10-14
Supplement: bmjopen-2016-012532supp_file4.pdf [file bmjopen-2016-012532supp_file4.pdf]

**SUPPLEMENTAL FILE 4.** The reasons for rejections of referrals by community pharmacists.  
(n=389)

| <b>Reasons for rejections</b>          | <b>Number (%)</b> |
|----------------------------------------|-------------------|
| Patient was uncontactable              | 138 (35.5)        |
| Patient Housebound                     | 75 (19.3)*        |
| Wrong pharmacy                         | 48 (12.3)         |
| Pharmacy unable to provide the service | 36 (9.3)          |
| Patient refused service                | 35 (9.0)          |
| Patient re-admitted                    | 21 (5.4)          |
| MUR/NMS not appropriate                | 14 (3.6)          |
| Problems with details on referral      | 9 (2.3)           |
| Miscellaneous other                    | 8 (2.0)           |
| Patient deceased                       | 5 (1.3)           |

\*prior to a change being made to the *PharmOutcomes* template June 2015 (see Supplemental File 2) 39% of rejections were due to the patient being 'housebound'. In the period 1<sup>st</sup> June- 31<sup>st</sup> July 2015 this rate dropped to 14.3%
